# Supplementary material for: An ancient role for CYP73 monooxygenases in phenylpropanoid biosynthesis and embryophyte development
Source: PubMed Central journal article supplement (PMC11405693; doi:10.1038/s44318-024-00181-7), 2024-08-01
Supplement: 44318_2024_181_MOESM1_ESM.pdf [file 44318_2024_181_MOESM1_ESM.pdf]

# An ancient role for CYP73 monooxygenases in phenylpropanoid biosynthesis and embryophyte development

## Appendix

- p. 2 | **Appendix Figure S1.** *In vitro* C4H assay with *Klebsormidium nitens* kfl00038\_0230 recombinant protein.
- p. 3 | **Appendix Figure S2.** Cytochromes P450 CO difference spectra of wild-type and R>A mutated CYP73 proteins.
- p. 4 | **Appendix Figure S3.** Western-blot analysis of recombinant PpPpCYP73A-3xHA proteins.
- p. 5 | **Appendix Figure S4.** Molecular characterization of *Physcomitrium patens*  $\Delta$ CYP73A mutants.
- p. 6 | **Appendix Figure S5.** Macroscopic phenotypes of *Physcomitrium patens*  $\Delta$ CYP73A mutants.
- p. 7 | **Appendix Figure S6.** Expression analysis of *PpCYP73A48* and *PpCYP73A49* genes in mutant backgrounds.
- p. 8 | **Appendix Figure S7.** Chemical complementation of  $\Delta$ *PpCYP73A48/CYP73A49* gametophore stunted growth with *p*-coumaric acid.
- p. 9 | **Appendix Figure S8.** Search for *cis*-cinnamic acid in C4H-impaired plants.
- p. 10 | **Appendix Figure S9.** Molecular characterization of *Mpcyp73a1* CRISPR mutants.
- p. 11 | **Appendix Table S1.** Search for CYP73 homologs in Viridiplantae proteomes by reciprocal best hits (RBH).
- p. 12 | **Appendix Table S2.** Quantification of free hydroxycinnamic acids in crude extracts of *M. polymorpha* and *A. agrestis* after PA treatment.
- p. 13 | **Appendix Table S3.** List of primers and synthesized sequences used in the study.
- p. 15 | **Appendix Table S4.** List of multiple reaction monitoring (MRM) methods used for targeted analysis by UHPLC-MS/MS.
- p. 16 | **Appendix Table S5.** List of quantification masses and molar response factors used for quantitative analysis of cuticular monomers by GC-TOFMS.

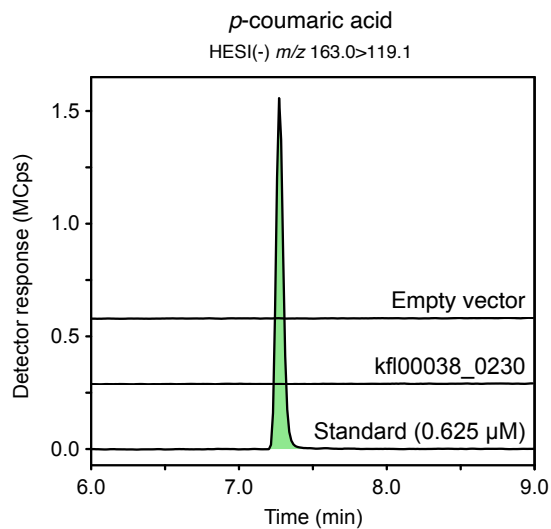

**Appendix Figure S1. *In vitro* C4H assay with *Klebsormidium nitens* kfl00038\_0230 recombinant protein.** Representative UHPLC-MS/MS chromatograms showing the absence of *p*-coumaric acid production from *t*-cinnamic acid (C4H activity) in *in vitro* assay using microsomes from yeasts transformed with the pYeDP60:kfl00038\_0230 plasmid. Negative control assays were performed with microsomes from yeasts transformed with an empty vector.

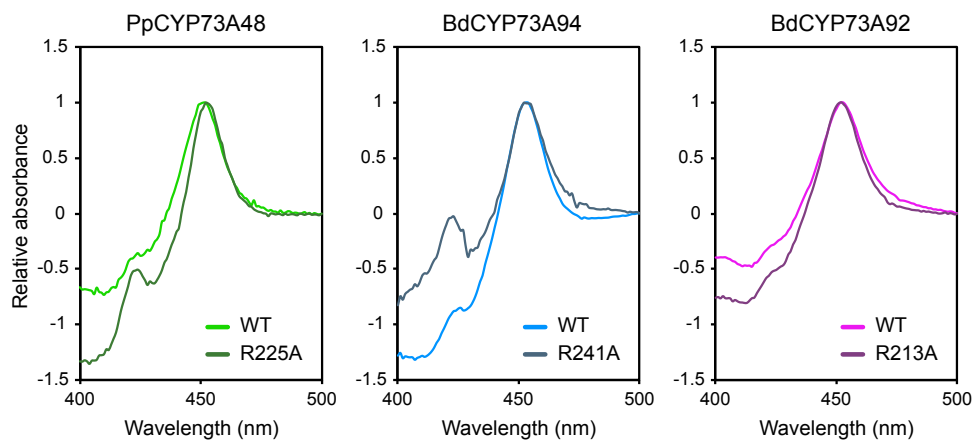

**Appendix Figure S2. Cytochromes P450 CO difference spectra of wild-type and R>A mutated CYP73 proteins.** Properly folded CYPs exhibit a maximum absorbance at 450 nm when bound to carbon monoxide. CO difference spectra were determined from 20-fold dilution of microsomal preparations. Each absorbance spectrum was normalized according to its maximum (set to 1).

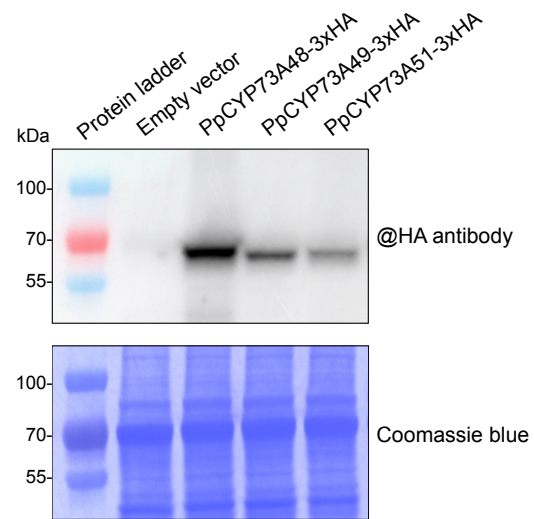

**Appendix Figure S3. Western-blot analysis of recombinant PpPpCYP73A-3xHA proteins.** Microsomes were 10-fold diluted in denaturation buffer (200 mM Tris pH 6.8, 8% SDS, 40% glycerol, 0.1% bromophenol blue and 100 mM DTT) prior to denaturation at 65°C for 5 min. Ten micrograms total protein were loaded on each lane.

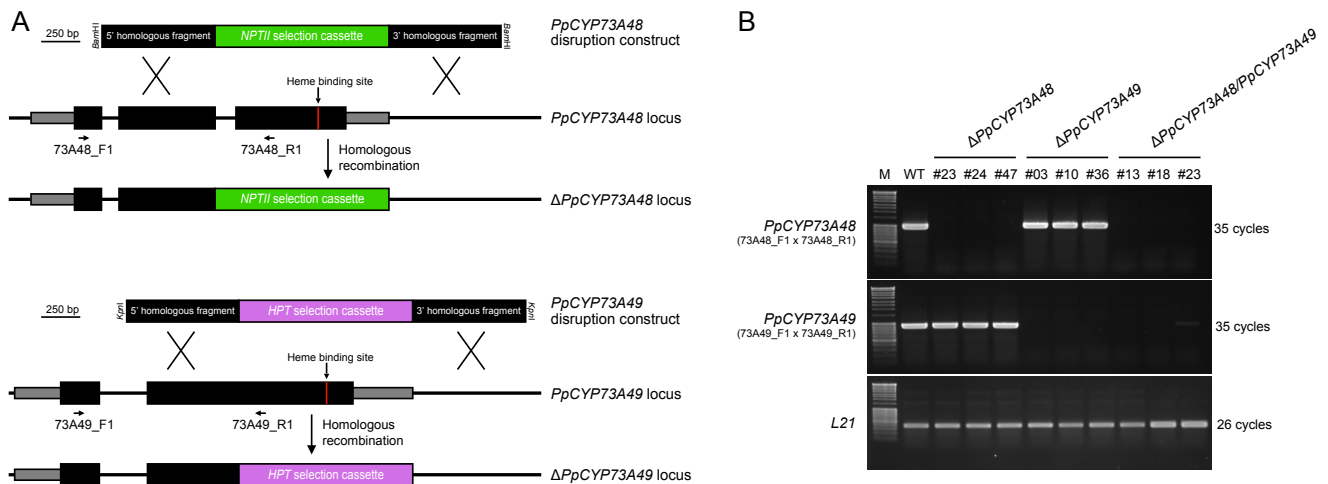

**Appendix Figure S4. Molecular characterization of *Physcomitrium patens*  $\Delta$ CYP73A mutants.** (A) Homologous recombination-mediated strategy for *PpCYP73A48* and *PpCYP73A49* gene disruption. Genomic fragments encompassing the critical heme-binding site were excised with simultaneous insertion of the *NPTII* (*PpCYP73A48*) or *HPT* (*PpCYP73A49*) selection cassette conferring resistance to geneticin and hygromycin B, respectively. (B) RT-PCR analysis of  $\Delta$ *PpCYP73A48*,  $\Delta$ *PpCYP73A49* and  $\Delta$ *PpCYP73A48/PpCYP73A49* mutant lines showing the absence of corresponding transcripts. The primer hybridization sites for RT-PCR are indicated in panel A. RT-PCR analysis of *L21* transcripts was used as amplification control. M, MassRuler™ DNA Ladder (ThermoFisher Scientific).

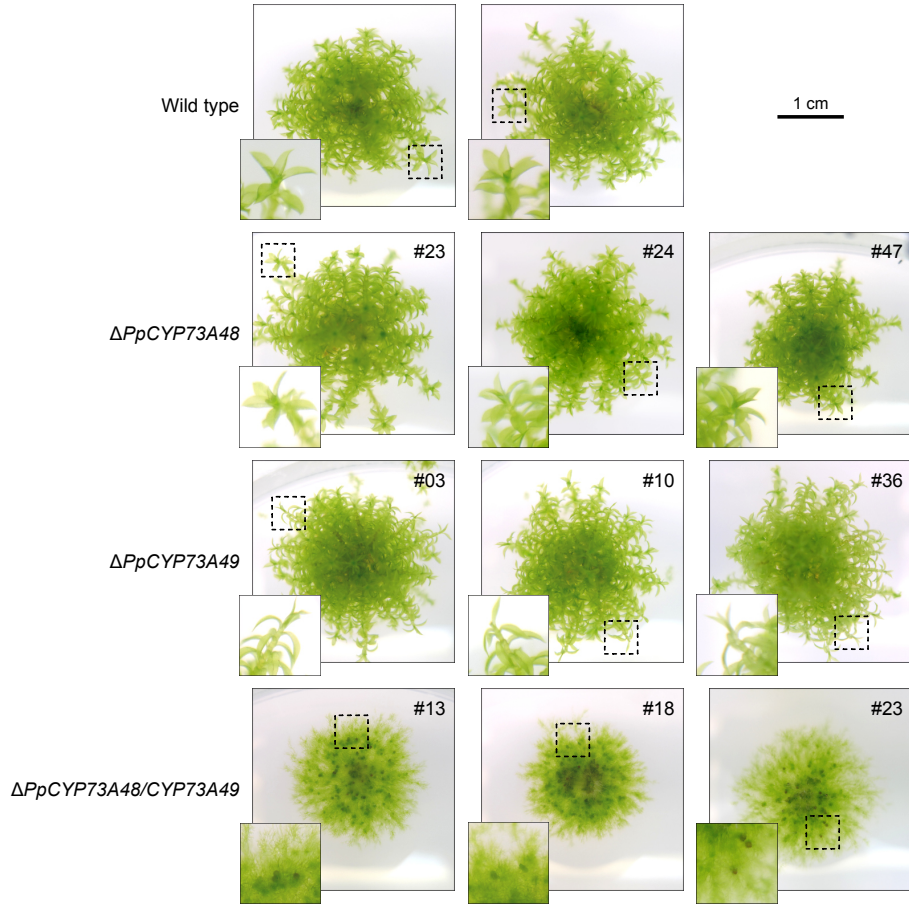

**Appendix Figure S5. Macroscopic phenotypes of *Physcomitrium patens*  $\Delta$ CYP73A mutants.** Pictures of two-month-old *P. patens* colonies highlighting the consistent phenotypes observed across three independent lines for each genotype. For each colony, a 2.4x magnification of boxed area is shown.

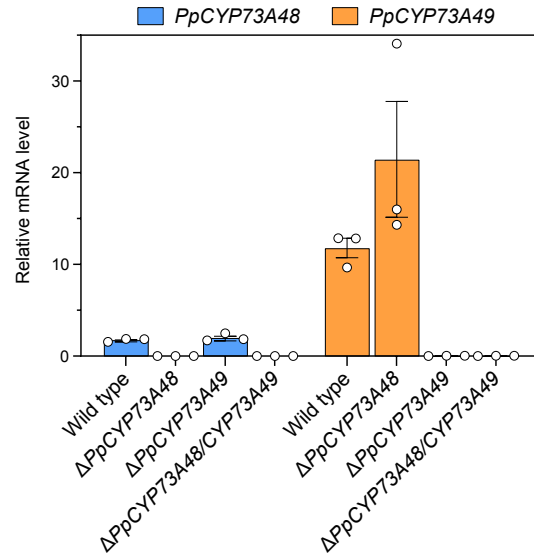

**Appendix Figure S6. Expression analysis of *PpCYP73A48* and *PpCYP73A49* genes in mutant backgrounds.** Relative mRNA levels were determined by RT-qPCR in wild type,  $\Delta PpCYP73A48$ ,  $\Delta PpCYP73A49$  and  $\Delta PpCYP73A48/CYP73A49$  mutant lines. Results are the mean  $\pm$  SEM of three independent WT biological replicates and three independent mutant lines.

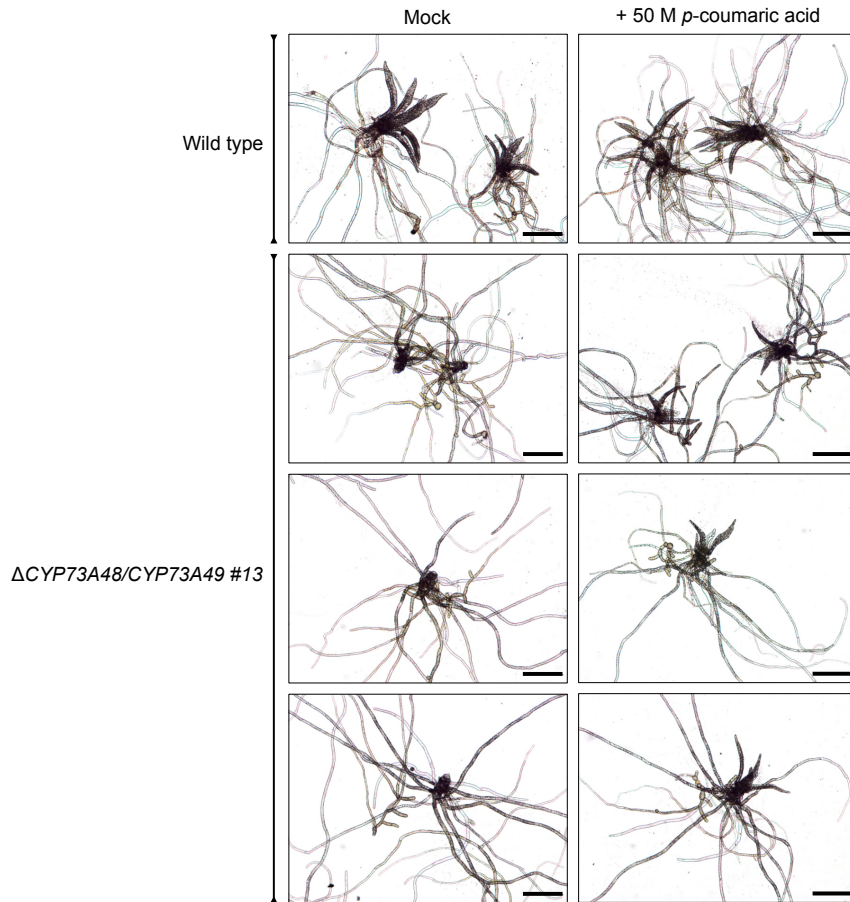

**Appendix Figure S7. Chemical complementation of  $\Delta$ PpCYP73A48/CYP73A49 gametophore stunted growth with *p*-coumaric acid.** Protoplasts from wild type and  $\Delta$ PpCYP73A48/CYP73A49 #13 mutant line were embedded in low-melting point agarose and regenerated in the presence of 50  $\mu$ M *p*-coumaric acid or a corresponding mock medium (0.1% ethanol). Pictures were taken five weeks after start of regeneration and illustrate the positive effect of *p*-coumaric acid in rescuing the stunted growth of  $\Delta$ PpCYP73A48/CYP73A49 #13 gametophores. No significant effects of *p*-coumaric acid were observed in the wild type. Scale bars, 0.25 mm.



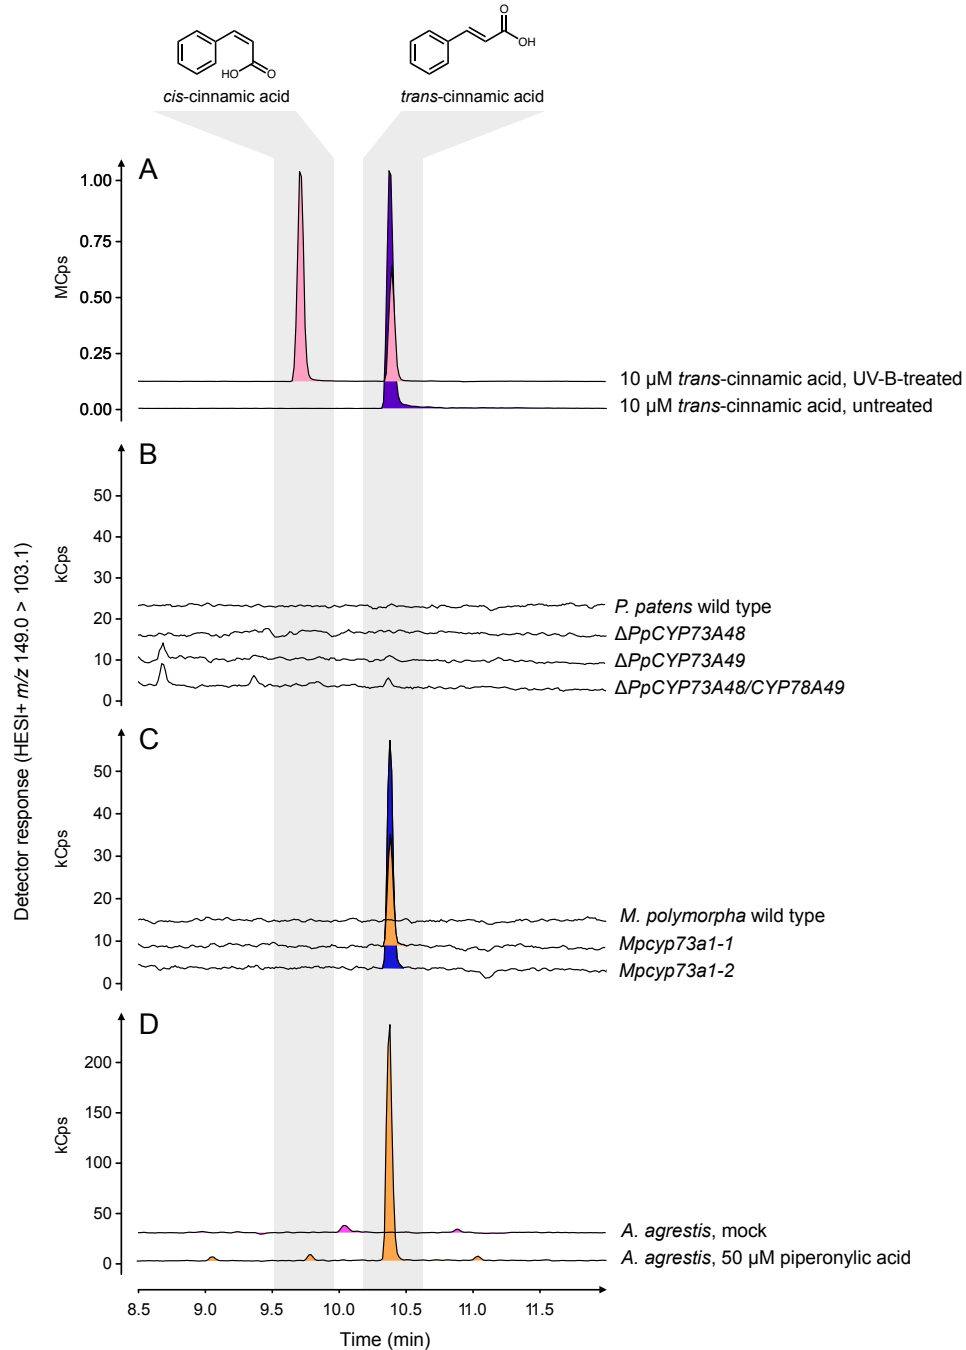

**Appendix Figure S8. Search for *cis*-cinnamic acid in C4H-impaired plants.** (A) A 10  $\mu$ M *trans*-cinnamic acid solution was treated for 15 min with UV-B light provided by four UVB Broadband TL 40W/12 RS SLV tubes (Phillips), resulting in the appearance of the stereoisomer *cis*-cinnamic acid. Both isomers were then searched by UHPLC-MS/MS in crude extracts of (B) *P. patens* wild type and  $\Delta$ CYP73A mutants (see Fig. 4), (C) *M. polymorpha* wild type and *Mpcyp73a1* CRISPR mutants (see Fig. 5), and in (D) *A. agrestis* treated with 50  $\mu$ M piperonylic acid or corresponding mock treatment (see Fig. 6). Shown are representative UHPLC-MS/MS chromatograms.

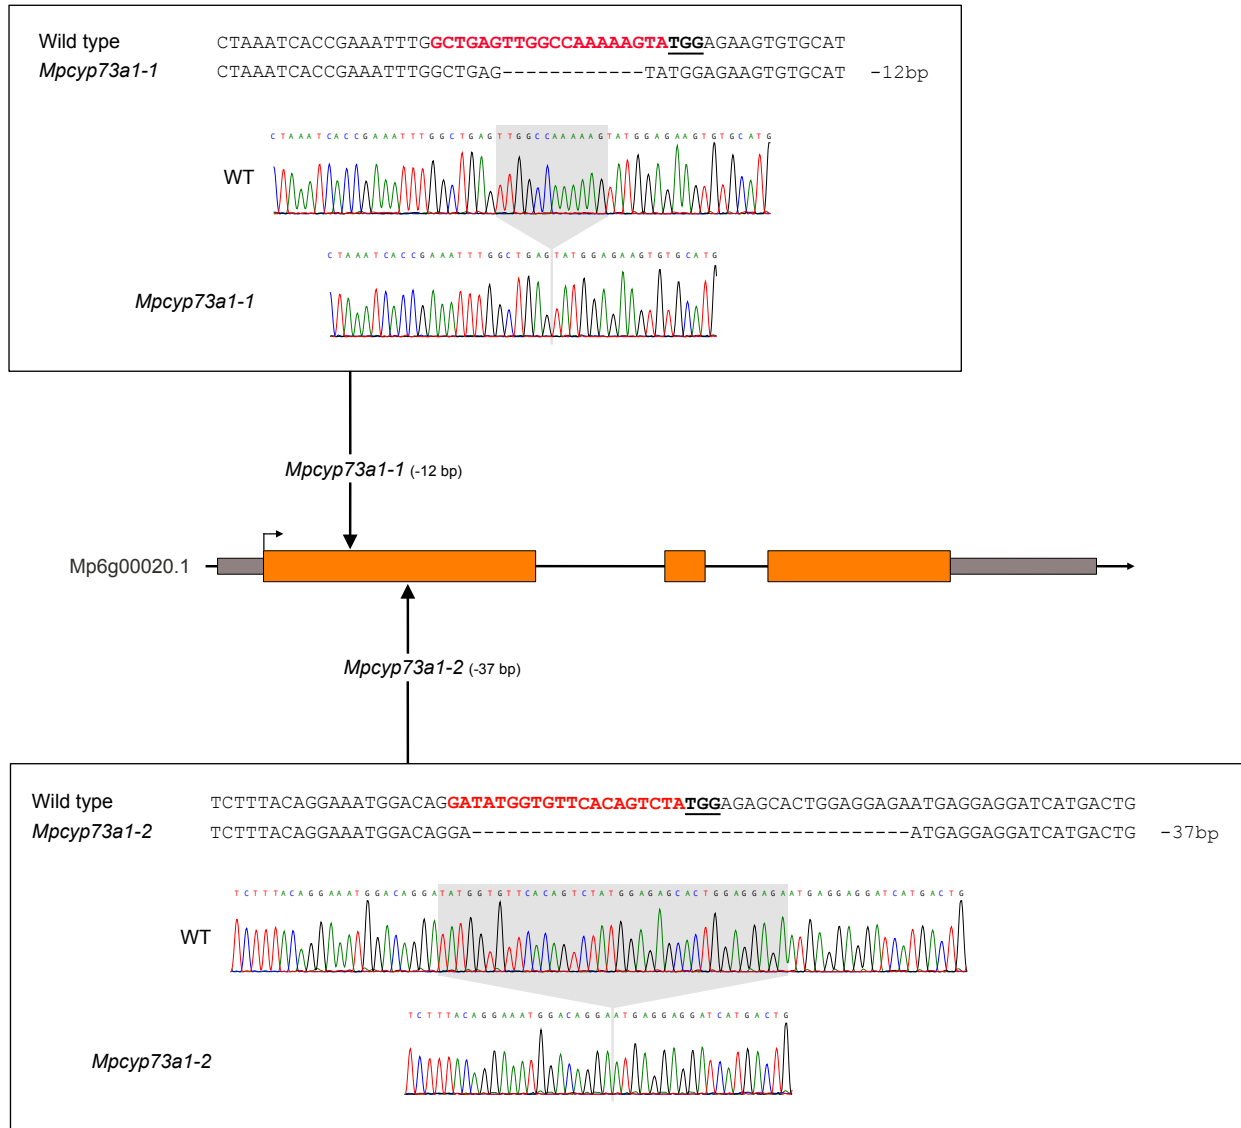

**Appendix Figure S9. Molecular characterization of *Mpcyp73a1* CRISPR mutants.** Two independent *Mpcyp73a1* CRISPR mutant lines were isolated and characterized by Sanger sequencing. The protospacer sequences, their corresponding locations, and the sequencing results are shown for both mutant lines. *Mpcyp73a1-1* exhibits a deletion of 12 nucleotides, while *Mpcyp73a1-2* displays a deletion of 37 nucleotides.

**Appendix Table S1. Search for CYP73 homologs in Viridiplantae proteomes by reciprocal best hits (RBH).** Forward BLASTp search across 20 Viridiplantae species was performed using *A. thaliana* CYP73A5 protein sequence as query. For each species, the top hit based on the bit-score was used to perform a reverse BLASTp search against the *Arabidopsis thaliana* proteome.

| Plant species                     | Forward BLASTp      |           |         |          | Reverse BLASTp       |           |
|-----------------------------------|---------------------|-----------|---------|----------|----------------------|-----------|
|                                   | Best hit            | Bit-score | e-value | identity | Best hit             | Bit-score |
| <i>Arabidopsis thaliana</i>       | AT2G30490           | 1037      | 0       | 100%     | AT2G30490   CYP73A5  | 1037      |
| <i>Brachypodium distachyon</i>    | Bradi2g53470        | 862       | 0       | 80%      | AT2G30490   CYP73A5  | 839       |
| <i>Amborella trichopoda</i>       | scaffold00077.91    | 873       | 0       | 83%      | AT2G30490   CYP73A5  | 853       |
| <i>Picea abies</i>                | MA_118702g0010      | 814       | 0       | 79%      | AT2G30490   CYP73A5  | 813       |
| <i>Thuja plicata</i>              | Thupl.29378841s0014 | 810       | 0       | 79%      | AT2G30490   CYP73A5  | 814       |
| <i>Salvinia cucullata</i>         | s0039.g012203       | 755       | 0       | 76%      | AT2G30490   CYP73A5  | 749       |
| <i>Ceratopteris richardii</i>     | Ceric.38G063100     | 757       | 0       | 72%      | AT2G30490   CYP73A5  | 738       |
| <i>Diphasiastrum complanatum</i>  | Dicom.04G054900     | 782       | 0       | 76%      | AT2G30490   CYP73A5  | 764       |
| <i>Selaginella moellendorffii</i> | 175973              | 714       | 0       | 71%      | AT2G30490   CYP73A5  | 720       |
| <i>Physcomitrium patens</i>       | Pp3c4_21680         | 767       | 0       | 73%      | AT2G30490   CYP73A5  | 747       |
| <i>Marchantia polymorpha</i>      | Mp6g00020           | 706       | 0       | 71%      | AT2G30490   CYP73A5  | 718       |
| <i>Anthoceros agrestis</i>        | 228.5028.1          | 748       | 0       | 72%      | AT2G30490   CYP73A5  | 743       |
| <i>Penium margaritaceum</i>       | pm004896g0030       | 116       | 3e-26   | 26%      | AT2G26170   CYP711A1 | 208       |
| <i>Zygnema circumcaritanum</i>    | Zci_08574.1         | 162       | 4e-42   | 28%      | AT2G40890   CYP98A3  | 310       |
| <i>Mesotaenium endlicherianum</i> | ME000292S04845      | 115       | 8e-26   | 27%      | AT1G31800   CYP97A3  | 695       |
| <i>Spirogloea muscicola</i>       | SM000094S24703      | 111       | 2e-24   | 24%      | AT1G31800   CYP97A3  | 709       |
| <i>Chara braunii</i>              | CHBRA18g00060       | 163       | 2e-41   | 35%      | AT2G45560   CYP76C1  | 187       |
| <i>Klebsormidium nitens</i>       | kfl00038_0230       | 235       | 1e-69   | 31%      | AT2G40890   CYP98A3  | 260       |
| <i>Chlamydomonas reinhardtii</i>  | Cre02.g142266       | 119       | 4e-27   | 25%      | AT1G31800   CYP97A3  | 590       |
| <i>Ostreococcus lucimarinus</i>   | gwEuk.21.62.1       | 114       | 7e-26   | 25%      | AT1G31800   CYP97A3  | 565       |

**Appendix Table S2. Quantification of free hydroxycinnamic acids in crude extracts of *M. polymorpha* and *A. agrestis* after PA treatment.** HCAA levels are expressed as nmoles/g dry weight. Results are the mean  $\pm$  SEM of three independent biological replicates for each condition. Mock versus PA unpaired *t* test adjusted P-value: \**P*<0.05; \*\**P*<0.01; \*\*\**P*<0.001. nd, not detected.

|                         | <i>M. polymorpha</i> |                  | <i>A. agrestis</i> |                    |
|-------------------------|----------------------|------------------|--------------------|--------------------|
|                         | Mock                 | PA               | Mock               | PA                 |
| <i>t</i> -cinnamic acid | n.d                  | 961.2 $\pm$ 69.5 | n.d                | 244.2 $\pm$ 14.8   |
| <i>p</i> -coumaric acid | 39.4 $\pm$ 2.1       | ***7.9 $\pm$ 0.9 | 8089.5 $\pm$ 406.1 | ***59.6 $\pm$ 9.1  |
| caffeic acid            | 0.6 $\pm$ 0.1        | n.d              | 347.4 $\pm$ 19.1   | **184.2 $\pm$ 26.1 |
| ferulic acid            | 57.9 $\pm$ 2.7       | ***2.9 $\pm$ 0.3 | 35.3 $\pm$ 1.2     | ***0.8 $\pm$ 0.4   |

**Appendix Table S3. List of primers and synthesized sequences used in the study.**

| ID                                                                   | Name                       | Sequence (5'>3')                                    |
|----------------------------------------------------------------------|----------------------------|-----------------------------------------------------|
| <b>Gene expression analysis by RT-qPCR</b>                           |                            |                                                     |
| SK0561                                                               | MpACT7_qF                  | AGGCATCTGGTATCCACGAG                                |
| SK0562                                                               | MpACT7_qR                  | ACATGGTCGTTCTCCAGAC                                 |
| SK0563                                                               | MpEF1a_qF                  | CCGAGATCCTGACCAAGG                                  |
| SK0564                                                               | MpEF1a_qR                  | GAGGTGGGTACTCAGCGAAG                                |
| SK0569                                                               | MpCYP73A1_qF               | TATCCTCGGTCGTGGACACT                                |
| SK0570                                                               | MpCYP73A1_qR               | AGAAGGGGAATGGCCATGTG                                |
| SK0565                                                               | MpCYP73A2_qF               | GCGCTCAAGGACAAGAGACT                                |
| SK0566                                                               | MpCYP73A2_qR               | TGAAGTCGATGGCCACCTTC                                |
| SK0567                                                               | MpCYP73A3_qF               | ATGAGCTGGACACGGTTCTG                                |
| SK0568                                                               | MpCYP73A3_qR               | TTCACCACCGCCGTCAAATA                                |
| <b>Characterization of <i>P. patens</i> mutants by RT-PCR</b>        |                            |                                                     |
| HR635                                                                | L21_sqF                    | GGTTGGTCATGGGTTGCG                                  |
| HR636                                                                | L21_sqR                    | GAGGTCAACTGTCTCGCC                                  |
| HR629                                                                | 73A48_F1                   | CGTGCAAGGATTATGCGTGG                                |
| HR630                                                                | 73A48_R1                   | TCAGGCTCGCTCACAAATT                                 |
| HR627                                                                | 73A49_F1                   | TAATGCAGCGGTGTCGAGTT                                |
| HR628                                                                | 73A49_R1                   | GCCGCGACGTTAATGTTCTC                                |
| <b>Genotyping of <i>cyp73a5-1</i> mutant line</b>                    |                            |                                                     |
| HR216                                                                | GABI_o8409                 | ATATTGACCATCATACTCATTGC                             |
| HR158                                                                | GK_753B06_LP               | TCAGCAGCTTCTCTGCTTTC                                |
| HR159                                                                | GK_753B06_RP               | CCTTATGCAAGCAGAGACGTC                               |
| <b>Protospacers for CRISPR/Cas9 (Golgen Gate cloning)</b>            |                            |                                                     |
| HR1279                                                               | MpCYP73A1_gRNA1_Bsal_F     | ctcgGCTGAGTTGGCCAAAAAGTA                            |
| HR1280                                                               | MpCYP73A1_gRNA1_Bsal_R     | aaacTACTTTTTGGCCAACTCAGC                            |
| HR1281                                                               | MpCYP73A1_gRNA2_Bsal_F     | ctcgGATATGGTGTTCACAGTCTA                            |
| HR1282                                                               | MpCYP73A1_gRNA2_Bsal_R     | aaacTAGACTGTGAACACCATATC                            |
| <b>Genotyping of CRISPR/Cas9 lines (PCR &amp; Sanger sequencing)</b> |                            |                                                     |
| HR1283                                                               | MpCYP73A1_gRNA1/2_screen_F | GCTTCAAGCAGCAGCATGTT                                |
| HR1284                                                               | MpCYP73A1_gRNA1/2_screen_R | ACATCATGAGCTGCAGCCTT                                |
| <b>CDS cloning (Gateway® cloning)</b>                                |                            |                                                     |
| HR438                                                                | PpCYP73A48_AttB1           | ggggacaagttgtacaaaaaagcaggcttcATGGCGGGCACAATAACGAT  |
| HR439                                                                | PpCYP73A48_AttB2           | ggggaccacttgtacaagaaagctgggtcCTAGACGGCAAGAGGTCTGG   |
| HR436                                                                | PpCYP73A49_AttB1           | ggggacaagttgtacaaaaaagcaggcttcATGGGAGCAGGATGGAAGGA  |
| HR437                                                                | PpCYP73A49_AttB2           | ggggaccacttgtacaagaaagctgggtcTTAAGCGATGGGTTTGCAGAC  |
| HR440                                                                | PpCYP73A51_AttB1           | ggggacaagttgtacaaaaaagcaggcttcATGGGGAAGCCAATGGGC    |
| HR441                                                                | PpCYP73A51_AttB2           | ggggaccacttgtacaagaaagctgggtcCTAGGCTCTCGGCCTTGTG    |
| HR1293                                                               | MpCYP73A1_AttB1            | ggggacaagttgtacaaaaaagcaggcttcATGTGGGTGAGAGAGCAGC   |
| HR1294                                                               | MpCYP73A1_AttB2            | ggggaccacttgtacaagaaagctgggtcTCAATCAGCCCTCGGTTTAACA |
| <b>Site-directed mutagenesis</b>                                     |                            |                                                     |
| HR642                                                                | PpCYP73A48_R225A_F         | GAGCCAACCGACTGGCCTCCCGTTAAGTG                       |
| HR643                                                                | PpCYP73A48_R225A_R         | CACTTAACGGGGAGGCCAGTCGGTTGGCTC                      |
| HR646                                                                | CYP73A94opti_R241A_F       | GTGCTAGACGGCTAGCTTCGGAATTAATCTGGTAGCTTGA            |
| HR647                                                                | CYP73A94opti_R241A_R       | TCCAAGCTACCAGATTTAATTCGAAGCTAGCCGTCTAGCAC           |
| HR549                                                                | CYP73A92opti_R213A_F       | GTAAAGGCTTTGAACGCCAAGCATCTATACTAAGCCAGTCATTT        |
| HR550                                                                | CYP73A92opti_R213A_R       | AAATGACTGGCTTAGTATAGATGCTTCGGCGTTCAAAGCCTTTAAC      |
| <b><i>PpCYP73A</i> disruption construct (Gibson cloning)</b>         |                            |                                                     |
| HR487                                                                | pGEM-T_Easy_F              | TCTATAGTGCACCTAAATAGCTTG                            |
| HR488                                                                | pGEM-T_Easy_R              | GCCCTATAGTGAGTCGTATTAC                              |
| HR489                                                                | CYP73A48_fragment5'_F      | aatacgaactactatagggcggatccCTCTCATGTTTGGTTGAATG      |
| HR490                                                                | CYP73A48_fragment5'_R      | gtcatagctgTTTTCGCTCATCGACAAAATG                     |
| HR491                                                                | NPTII_CYP73A48_F           | atgagcgaaaCAGCTATGACCATGATTACGC                     |
| HR492                                                                | NPTII_CYP73A48_R           | ggaatgtgcaTTGGTAACGCCAGGGTT                         |
| HR493                                                                | CYP73A48_fragment3'_F      | cgttacccaaTGCACATTCATGCCAAC                         |

|                                              |                              |                                                                                                                                                                                                                                                                                                                                                                                                                                                                                                                                                                                                                                                                                                                                                                                                                                                                                                                                                                                                                                                                                                                                                                                                                                                                                                                                                                                                                                                                                                                                                                                                                                                                                                                                                                                                |
|----------------------------------------------|------------------------------|------------------------------------------------------------------------------------------------------------------------------------------------------------------------------------------------------------------------------------------------------------------------------------------------------------------------------------------------------------------------------------------------------------------------------------------------------------------------------------------------------------------------------------------------------------------------------------------------------------------------------------------------------------------------------------------------------------------------------------------------------------------------------------------------------------------------------------------------------------------------------------------------------------------------------------------------------------------------------------------------------------------------------------------------------------------------------------------------------------------------------------------------------------------------------------------------------------------------------------------------------------------------------------------------------------------------------------------------------------------------------------------------------------------------------------------------------------------------------------------------------------------------------------------------------------------------------------------------------------------------------------------------------------------------------------------------------------------------------------------------------------------------------------------------|
| HR494                                        | CYP73A48_fragment3'_R        | tatttaggtgacactatagaggatccTGTAAATGTTGGTGCATTAACAATAA                                                                                                                                                                                                                                                                                                                                                                                                                                                                                                                                                                                                                                                                                                                                                                                                                                                                                                                                                                                                                                                                                                                                                                                                                                                                                                                                                                                                                                                                                                                                                                                                                                                                                                                                           |
| HR501                                        | CYP73A49_fragment5'_F        | aatacgaactactatagggcggtaccTCGTCAAAGCTGAAATGCTTC                                                                                                                                                                                                                                                                                                                                                                                                                                                                                                                                                                                                                                                                                                                                                                                                                                                                                                                                                                                                                                                                                                                                                                                                                                                                                                                                                                                                                                                                                                                                                                                                                                                                                                                                                |
| HR502                                        | CYP73A49_fragment5'_R        | cggcaagcttGCCTGGGTCCCAAGGTTG                                                                                                                                                                                                                                                                                                                                                                                                                                                                                                                                                                                                                                                                                                                                                                                                                                                                                                                                                                                                                                                                                                                                                                                                                                                                                                                                                                                                                                                                                                                                                                                                                                                                                                                                                                   |
| HR503                                        | HPT_CYP73A49_F               | ggaccaggcAAGCTTGCCGCCAAGGAT                                                                                                                                                                                                                                                                                                                                                                                                                                                                                                                                                                                                                                                                                                                                                                                                                                                                                                                                                                                                                                                                                                                                                                                                                                                                                                                                                                                                                                                                                                                                                                                                                                                                                                                                                                    |
| HR504                                        | HPT_CYP73A49_R               | ttggcaacgaGGATCCCGATCTAGTAACATAGATG                                                                                                                                                                                                                                                                                                                                                                                                                                                                                                                                                                                                                                                                                                                                                                                                                                                                                                                                                                                                                                                                                                                                                                                                                                                                                                                                                                                                                                                                                                                                                                                                                                                                                                                                                            |
| HR505                                        | CYP73A49_fragment3'_F        | atcgggatccTCGTTGCCAACACTTTTTTC                                                                                                                                                                                                                                                                                                                                                                                                                                                                                                                                                                                                                                                                                                                                                                                                                                                                                                                                                                                                                                                                                                                                                                                                                                                                                                                                                                                                                                                                                                                                                                                                                                                                                                                                                                 |
| HR506                                        | CYP73A49_fragment3'_R        | tatttaggtgacactatagaggtaccAAAAATCCCATAACTTTGATACTTATTC                                                                                                                                                                                                                                                                                                                                                                                                                                                                                                                                                                                                                                                                                                                                                                                                                                                                                                                                                                                                                                                                                                                                                                                                                                                                                                                                                                                                                                                                                                                                                                                                                                                                                                                                         |
| <b>PpCYP73A:uidA (Gibson cloning)</b>        |                              |                                                                                                                                                                                                                                                                                                                                                                                                                                                                                                                                                                                                                                                                                                                                                                                                                                                                                                                                                                                                                                                                                                                                                                                                                                                                                                                                                                                                                                                                                                                                                                                                                                                                                                                                                                                                |
| HR487                                        | pGEM-T_Easy_F                | TCTATAGTGACCTAAATAGCTTG                                                                                                                                                                                                                                                                                                                                                                                                                                                                                                                                                                                                                                                                                                                                                                                                                                                                                                                                                                                                                                                                                                                                                                                                                                                                                                                                                                                                                                                                                                                                                                                                                                                                                                                                                                        |
| HR488                                        | pGEM-T_Easy_R                | GCCCTATAGTGAGTCGTATTAC                                                                                                                                                                                                                                                                                                                                                                                                                                                                                                                                                                                                                                                                                                                                                                                                                                                                                                                                                                                                                                                                                                                                                                                                                                                                                                                                                                                                                                                                                                                                                                                                                                                                                                                                                                         |
| HR597                                        | CYP73A48_GUS_fragment5'_F    | aatacgaactactatagggcggtaccTCTTGATGAGGAATGTAGGAGG                                                                                                                                                                                                                                                                                                                                                                                                                                                                                                                                                                                                                                                                                                                                                                                                                                                                                                                                                                                                                                                                                                                                                                                                                                                                                                                                                                                                                                                                                                                                                                                                                                                                                                                                               |
| HR598                                        | CYP73A48_GUS_fragment5'_R    | ttaagcctgcGACGGCAAGAGGTCTGGC                                                                                                                                                                                                                                                                                                                                                                                                                                                                                                                                                                                                                                                                                                                                                                                                                                                                                                                                                                                                                                                                                                                                                                                                                                                                                                                                                                                                                                                                                                                                                                                                                                                                                                                                                                   |
| HR599                                        | GUS_CYP73A48_F               | tcttgcctgcGACGGCTTAATGTTACGTC                                                                                                                                                                                                                                                                                                                                                                                                                                                                                                                                                                                                                                                                                                                                                                                                                                                                                                                                                                                                                                                                                                                                                                                                                                                                                                                                                                                                                                                                                                                                                                                                                                                                                                                                                                  |
| HR600                                        | GUS_CYP73A48_R               | aaatgcaaacTCATTGTTTGCCTCCCTGCTG                                                                                                                                                                                                                                                                                                                                                                                                                                                                                                                                                                                                                                                                                                                                                                                                                                                                                                                                                                                                                                                                                                                                                                                                                                                                                                                                                                                                                                                                                                                                                                                                                                                                                                                                                                |
| HR601                                        | CYP73A48_GUS_fragment3'_F    | caacaatgaGTTTGCATTTTTGTGACAG                                                                                                                                                                                                                                                                                                                                                                                                                                                                                                                                                                                                                                                                                                                                                                                                                                                                                                                                                                                                                                                                                                                                                                                                                                                                                                                                                                                                                                                                                                                                                                                                                                                                                                                                                                   |
| HR602                                        | CYP73A48_GUS_fragment3'_R    | tatttaggtgacactatagaggtaccCAATGTTGGTTAATTTCCCTTC                                                                                                                                                                                                                                                                                                                                                                                                                                                                                                                                                                                                                                                                                                                                                                                                                                                                                                                                                                                                                                                                                                                                                                                                                                                                                                                                                                                                                                                                                                                                                                                                                                                                                                                                               |
| HR591                                        | CYP73A49_GUS_fragment5'_F    | aatacgaactactatagggcgatcACTTGAAGGTGTGTCAGGAG                                                                                                                                                                                                                                                                                                                                                                                                                                                                                                                                                                                                                                                                                                                                                                                                                                                                                                                                                                                                                                                                                                                                                                                                                                                                                                                                                                                                                                                                                                                                                                                                                                                                                                                                                   |
| HR592                                        | CYP73A49_GUS_fragment5'_R    | ttaagcctgcAGCGATGGGTTTGCAGAC                                                                                                                                                                                                                                                                                                                                                                                                                                                                                                                                                                                                                                                                                                                                                                                                                                                                                                                                                                                                                                                                                                                                                                                                                                                                                                                                                                                                                                                                                                                                                                                                                                                                                                                                                                   |
| HR593                                        | GUS_CYP73A49_F               | accatcctgcGACGGCTTAATGTTACGTC                                                                                                                                                                                                                                                                                                                                                                                                                                                                                                                                                                                                                                                                                                                                                                                                                                                                                                                                                                                                                                                                                                                                                                                                                                                                                                                                                                                                                                                                                                                                                                                                                                                                                                                                                                  |
| HR594                                        | GUS_CYP73A49_R               | gcgctgagcTCATTGTTTGCCTCCCTGCTG                                                                                                                                                                                                                                                                                                                                                                                                                                                                                                                                                                                                                                                                                                                                                                                                                                                                                                                                                                                                                                                                                                                                                                                                                                                                                                                                                                                                                                                                                                                                                                                                                                                                                                                                                                 |
| HR595                                        | CYP73A49_GUS_fragment3'_F    | caacaatgaGCTCAAGCGCAATGTGGA                                                                                                                                                                                                                                                                                                                                                                                                                                                                                                                                                                                                                                                                                                                                                                                                                                                                                                                                                                                                                                                                                                                                                                                                                                                                                                                                                                                                                                                                                                                                                                                                                                                                                                                                                                    |
| 5HR96                                        | CYP73A49_GUS_fragment3'_R    | tatttaggtgacactatagagatcTATTACAAAACATAGCTAAAAGTACAACCTATAC                                                                                                                                                                                                                                                                                                                                                                                                                                                                                                                                                                                                                                                                                                                                                                                                                                                                                                                                                                                                                                                                                                                                                                                                                                                                                                                                                                                                                                                                                                                                                                                                                                                                                                                                     |
| <b>Double-strand DNA fragments (gBlocks)</b> |                              |                                                                                                                                                                                                                                                                                                                                                                                                                                                                                                                                                                                                                                                                                                                                                                                                                                                                                                                                                                                                                                                                                                                                                                                                                                                                                                                                                                                                                                                                                                                                                                                                                                                                                                                                                                                                |
| HR1318                                       | PcCYP73Aoptimized_CDS_attB12 | ggggacaagttgtacaaaaagcaggcttcATGGCATGGGCCTGGCGTCTTTAGCTGTCTGTCAAGTGCGGCTA<br>TAGGCGCGCCGCGCCGAAAGAGTAGCCGCTGCAGAGGCCGTACAGGCTTCCAGCAGTTTCATTGGAGA<br>CCGCTCTATTGTCCCTTTTTGCCGTAGTCGTGGGTGATTCTTATCTTCCAATTGACCAGGAAAAAGC<br>TGAACCTGCCACCTGGACCTGCTCCTGTGCCGATCTTCGGTAATTGGCTTCAGGTGGGCGATGATCTA<br>AATCACAATAACTTAAGTAACTAGCGAAAAAACACGGCGACTGCTCTTATTGAGAATGGGTCAAAGA<br>AACCTAACTGTCATTTCTAGCCCGGAGCTGGCTAAAGAAAGTCTTCATACACAAAGGCGTTGAGTTTGG<br>CAGTAGAACTAGGAATGTAGTACTTGTATTTTTACAGGTAATGGCAAGATATGGTTTTCCCGCTCTAT<br>TCTGACCACTGGCGTAGAATGAGAAGGATAATGACAGTTCCATTTTTACAGGCAAGATGTTACGTCC<br>CTAAGATCTCGTTGGGAAAAGGAGTTGATATTACTTGGAGACCTGAAAACGATGGAAGGGGCAAG<br>TACTACTGGGATCGTGATCAGGAAGCGTTTGAATTAATGATGATAATTTTTATGTACCTTATGATGTTT<br>GACAGGCGTTTTCCGGGGGAAAGACGCCCACTATACAACAAATTAAGGTTCTTAACGCTGAGAGATC<br>CGTTTTATCTCAGTCTTTGAATTAATATGGGATTTTATCCCATACTGCGTCTTTCTTGAGGAAG<br>TATCTGGACCACTGCAGAGACATTAACAGAAAGCGTCTGGGCTTGTTCAAAGAACACTTCTGACGGA<br>AAGAAAAGAAATTTGATACCAAAAGGACTAGGCGCGGAGAAAACCTGGGCATGGACCTGGTTCGATG<br>CTGAGAAAGAACGGGAGATAAACGAAGACAAATGTGCTTTACATTGTGGAGAACAATAATGTCCGACGA<br>ATCGAGACCACCCTATGGTCTATCGAATGGGGATCGCCGAACCTGTCAACCACCCGAAAAATCCAGGC<br>GAAGTTGAGGGAGGAGTTAGATACAGTACTTGGCAAAGGAGTTCCCTGTTACCGAACCCGGATGTTCCGA<br>GTGGCAAGTTACCTTACCTAAGTGCAGTCTCAAGGAACATTGAGGTTGCACATGGCAATTCCTTTGT<br>TGGTACCACATATGAATCTTACTCAAGCGAAGTTAGGGGACTACGACATTCGGCTGAATCTCGTATCT<br>TGGTGAACGCTTGGTGTGTTAGCGAATAATCCCGACCTTTGGAAAAACCTGAGGAATTCGTCAGAA<br>AGATTCTTAGAGGAGGAAAAAGGGGTGGAAGCGAACGGCAACGATTTTCGTTTTCTGCCCTTCGGTGT<br>CGGTAGGCTAGTTGCCCGGGCATCATCTTGGCGCTTCCATCTTGGGCTTAGTCTAGGCAAACTGG<br>TCCAGACATTTGAACTAAGCACGCCCCAGGTGTCGATAAGGTGCACACGAAGGACAGCGGGGCA<br>GTTTCAGTCTTCGATAAAAACTCATTCCACTGTTGTTGTAACCCGCTGCTTGAaccgacttctgtacaaa<br>gtggctccc |
| HR1098                                       | kfl00038_0230_CDS_attB12     | ggggacaagttgtacaaaaagcaggcttcATGGACACTTTTACTGAGGGCTTGAAAACCAATCCAGTCAATGCATT<br>TCTGATCTCCTTGGTGGTGTCTTTCTGACCCCAATCTTGTGGACTATCGTGCACCAATATGTTAAGGT<br>GCTGAGAGCCCGGGGCACTTCCCGCGCCCTGCTCCACTGCCAGTCTTGGGCAACCTGGGGGAAAT<br>CTTTCGAGCCCCAAGCGCTTTGATGAGTGGTGCCTTCAAAGGCCAAGGCATATGGCGGCTTACG<br>CTTCTGGATGGGAGATCAGCTGTTTGTGTACGTCAGCTCGTATGAAGCGGTCAAGGAGGTCCTGGTTA<br>CGAAGGATAAAGAGTTTGCATCGAGGCCCTGATGCCTGAGCGTGTGCGCCCACTTTGGGGCCGAA<br>GAGCATCTTCATGTCAAGCTACGGGGAATACTGGCGCCAGGCTCGTAAGCTGTCGGTCTCCATCTAC<br>TCTCAAACAAGGCTGTCAAGACCAACGCCCTCAGTTCTGTGATGAAGAACCTAACACCCTCATCGGCCAT<br>CTGAAGGAAAGAGTGCAAGCGGGAGGGGGCATTGTGGAGCCGCGCAACACATCATCAGGACCAAT<br>CTCAACACCATGATGCTCCCACTGTTCCGATCCGTTTTCCCGCCCCACGGAGCCGGGCTTTAACGA<br>GAGGCGCGAGGCGCTCTACGCGAGCATTGAGGAGGCTTCCGCCAGATGGGCGACTTTGATTGGGG<br>AACCGTGTGCCCGGCTTGGCGCGTGTGAACCGTACGTCAGGAAGACGACAGCGTTTAGGGA<br>CAGGGAGCTGGAGCTTCTGATTGAGGAGCACCGCGCCGCAAGGAAAGGCGGAGGCTTCCGCTGCT<br>GGCGCGGATATGTTGACGACTGCTGACGATACCCGAAACGGAGGACCTGACGCTCAAGAACCTG<br>ATCTACATGCTTCTCGATCTGCTGAACCGCGCGTGGACACGAGCGCGCTTCCATCGAGTGGACGC<br>TAGCCGAGCTGACCCGACCGCGGAAATCCGGAACCGTTGCAAGCGGTTGCAAGCGGAGCTGGACAGTGAATGG<br>TCGGGAGAGACCGGTGCAAGAAGGGGACATCGAGAATTTGCCATATCTCCGAGCAGTCAAGGAG<br>CATTTTCGATACCGGGCGTCCGTCCTTCCCGGACCCGACTGTAATGAAGTGCAGCAGCGCTCC<br>AGGGGTATCGGATTCGCGCAAAACCGAGGTGATGGTGCACACCGGGGCTTGCAGCGGATCCCT<br>CTGTCTTCTCCCGGGCGGATGAGTTTCTCCCGACCGCTTCTCGCAGAGGACGTCGACATCACTGGA<br>AAGGACCTCCGGGTGCTACTTTTTGGCGCAGGTGCGAGGGGGTGTCTCGCATGTTCAAGGCCTAG<br>CGTCTGACATCTGGCGGTGGCCGGATCGTTCAAGCCTTCGACTTTGAGCTGATCGACGGAAGA<br>CATCGACATGGAGGAGCGAACTGGGCCTGCAAGTCTCATTGCGCACGCCGCTGAAAGCCCGTTT<br>ACGCCCCGTTAAaccgacttctgtacaaagtgtgctccc                                                                                 |

**Appendix Table S4. List of multiple reaction monitoring (MRM) methods used for targeted analysis by UHPLC-MS/MS.**

| Molecule                      | Ionization mode | Precursor ion | Collision energy | Product ion |
|-------------------------------|-----------------|---------------|------------------|-------------|
| cinnamic acid                 | positive        | 149.0         | 21.0             | 103.1       |
| <i>p</i> -coumaric acid       | negative        | 163.0         | 9.0              | 119.1       |
| caffeic acid                  | negative        | 179.0         | 18.0             | 135.1       |
| ferulic acid                  | positive        | 195.0         | 10.0             | 177.0       |
| <i>p</i> -coumaroyl-threonate | positive        | 283.0         | 10.0             | 147.0       |
| <i>p</i> -coumaroyl-shikimate | positive        | 320.9         | 8.0              | 147.0       |
| caffeoyl-threonate            | positive        | 299.0         | 38.0             | 89.0        |
| caffeoyl-shikimate            | positive        | 337.4         | 13.0             | 163.0       |
| rosmarinic acid               | negative        | 359.1         | 8.0              | 161.0       |

**Appendix Table S5. List of quantification masses and molar response factors used for quantitative analysis of cuticular monomers by GC-TOFMS.** IS, internal standard; TMS, Trimethylsilyl group.

| Analyte                                 | Quantification mass<br>(±500ppm) | Molar response factor<br>(relative to IS) |
|-----------------------------------------|----------------------------------|-------------------------------------------|
| ribitol, 5TMS (IS for glycerol)         | 73.08                            | 1.00                                      |
| glycerol, 3TMS                          | 73.08                            | 1.05                                      |
| C17:0, 1TMS (IS for FAMES)              | 74.06                            | 1.00                                      |
| <i>t</i> -cinnamate, methyl ester       | 131.06                           | 2.11                                      |
| <i>p</i> -coumarate, 1TMS, methyl ester | 73.07                            | 2.78                                      |
| caffeate, 2TMS, methyl ester            | 73.07                            | 0.84                                      |
| ferulate, 1TMS, methyl ester            | 250.08                           | 1.23                                      |
| 16-OH C16:0, 1TMS, methyl ester         | 75.05                            | 2.13                                      |
| 10,16-diOH C16:0, 2TMS, methyl ester    | 73.07                            | 1.52                                      |
| 1,9,18-triOH C18:0, 3TMS                | 73.07                            | *1.52                                     |
| C14:0, methyl ester                     | 74.06                            | 0.58                                      |
| C16:0, methyl ester                     | 74.06                            | 0.61                                      |
| C18:0, methyl ester                     | 74.06                            | 0.61                                      |
| C18:1, methyl ester                     | 55.09                            | 1.16                                      |
| C18:2, methyl ester                     | 67.08                            | 3.74                                      |
| C18:3, methyl ester                     | 79.07                            | 0.76                                      |
| C20:0, methyl ester                     | 74.06                            | 0.62                                      |
| C20:4, methyl ester                     | 79.08                            | #0.62                                     |
| C22:0, methyl ester                     | 74.06                            | 0.62                                      |
| C24:0, methyl ester                     | 74.06                            | 0.64                                      |

\*response factor of 10,16-diOH C16:0, 2TMS, methyl ester; #response factor of C20:0.
